# Supplementary material for: High-level ab initio quartic force fields and spectroscopic characterization of C2N−
Source: Royal Society of Chemistry journal article supplement (doi:10.1039/d1cp03505c), 2021-01-01
Supplement: d1cp03505c1.pdf [file d1cp03505c1.pdf]

# High-level ab initio quartic force fields and spectroscopic characterization of $\text{C}_2\text{N}^-$

C. M. R. Rocha<sup>1</sup> and H. Linnartz

*Laboratory for Astrophysics, Leiden Observatory, Leiden University, P.O. Box 9513, NL-2300 RA Leiden, The Netherlands.*

## Electronic Supplementary Information

---

<sup>1</sup>Corresponding author. E-mail address: romerorocha@strw.leidenuniv.nl

# Summary

- 1) SPECTRO input for  $\ell$ -CCN $^{-}$ ( $^3\Sigma^{-}$ )
- 2) SPECTRO input for  $c$ -CNC $^{-}$ ( $^1A_1$ )
- 3) Parameters employed in the rovibrational DVR3D calculations
- 4) Benchmark calculations: general results
- 5) Convergence of equilibrium geometries with respect to energy increments
- 6) Nuclear spin-rotation hyperfine tensors for  $\ell$ -CCN $^{-}$ ( $^3\Sigma^{-}$ ) and  $c$ -CNC $^{-}$ ( $^1A_1$ )
- 7) Simulated rotational spectra of  $\ell$ -CCN $^{-}$ ( $^3\Sigma^{-}$ ) and  $c$ -CNC $^{-}$ ( $^1A_1$ ) at  $T=100$  K
- 8) PGOPHER file for  $\ell$ -CCN $^{-}$ ( $^3\Sigma^{-}$ )
- 9) PGOPHER file for  $c$ -CNC $^{-}$ ( $^1A_1$ )
- 10) Simulated rotational spectra of  $\ell$ -CCO( $^3\Sigma^{-}$ ) at  $T=10$  K

```

# SPECTRO #####
  02  0  2  0  1  0  0  4  0  0  00  2  2  0  0
  0  1  0  0  0  1  0  0  0  0  0  0  0  0  0
# GEOM #####
  3  1
  7.00      0.000000000      0.000000000      -2.27467474151324
  6.00      0.000000000      0.000000000      0.000000000000000
  6.00      0.000000000      0.000000000      2.56886840390461
# LABELS #####
  2  3
  3  2
# FERMI1 #####
  1
  2  3
# CURVIL #####
  1  2
  3  2
  2  1  3
# DECMODE #####
  2  1  0
  1  3
  2
  4
# F2INT #####
  10
  1  1      12.3643019994
  2  1      2.0839285054
  3  1      0.0000000000
  4  1      0.0000000000
  2  2      5.4913699270
  3  2      0.0000000000
  4  2      0.0000000000
  3  3      0.4141452281
  4  3      0.0000000000
  4  4      0.4141452281
# F3INT #####
  20
  1  1  1      -94.3113195116
  2  1  1      2.4760757084
  3  1  1      0.0000000000
  4  1  1      0.0000000000
  2  2  1      -6.9086955905
  3  2  1      0.0000000000
  4  2  1      0.0000000000
  3  3  1      -0.8749187022
  4  3  1      0.0000000000
  4  4  1      -0.8749187022
  2  2  2      -38.6440217450
  3  2  2      0.0000000000
  4  2  2      0.0000000000
  3  3  2      -0.4844215654
  4  3  2      0.0000000000
  4  4  2      -0.4844215654
  3  3  3      0.0000000000
  4  3  3      0.0000000000
  4  4  3      0.0000000000
  4  4  4      0.0000000000
# F4INT #####
  35
  1  1  1  1      497.6683088840

```

|   |   |   |   |                |
|---|---|---|---|----------------|
| 2 | 1 | 1 | 1 | 21.1112698245  |
| 3 | 1 | 1 | 1 | 0.0000000000   |
| 4 | 1 | 1 | 1 | 0.0000000000   |
| 2 | 2 | 1 | 1 | -17.7900240513 |
| 3 | 2 | 1 | 1 | 0.0000000000   |
| 4 | 2 | 1 | 1 | 0.0000000000   |
| 3 | 3 | 1 | 1 | -0.3022059814  |
| 4 | 3 | 1 | 1 | 0.0000000000   |
| 4 | 4 | 1 | 1 | -0.3022059814  |
| 2 | 2 | 2 | 1 | 16.3592106505  |
| 3 | 2 | 2 | 1 | 0.0000000000   |
| 4 | 2 | 2 | 1 | 0.0000000000   |
| 3 | 3 | 2 | 1 | 2.4281390368   |
| 4 | 3 | 2 | 1 | 0.0000000000   |
| 4 | 4 | 2 | 1 | 2.4281390368   |
| 3 | 3 | 3 | 1 | 0.0000000000   |
| 4 | 3 | 3 | 1 | 0.0000000000   |
| 4 | 4 | 3 | 1 | 0.0000000000   |
| 4 | 4 | 4 | 1 | 0.0000000000   |
| 2 | 2 | 2 | 2 | 207.8714397514 |
| 3 | 2 | 2 | 2 | 0.0000000000   |
| 4 | 2 | 2 | 2 | 0.0000000000   |
| 3 | 3 | 2 | 2 | -0.7467327173  |
| 4 | 3 | 2 | 2 | 0.0000000000   |
| 4 | 4 | 2 | 2 | -0.7467327173  |
| 3 | 3 | 3 | 2 | 0.0000000000   |
| 4 | 3 | 3 | 2 | 0.0000000000   |
| 4 | 4 | 3 | 2 | 0.0000000000   |
| 4 | 4 | 4 | 2 | 0.0000000000   |
| 3 | 3 | 3 | 3 | 2.1642897777   |
| 4 | 3 | 3 | 3 | 0.0000000000   |
| 4 | 4 | 3 | 3 | 1.2736235634   |
| 4 | 4 | 4 | 3 | 0.0000000000   |
| 4 | 4 | 4 | 4 | 2.1642897777   |

```

# SPECTRO #####
  02  0  2  1  0  0  0  4  1  0  00  2  2  0  0
  1  0  0  0  0  1  0  0  0  0  0  1  0  0  0
# GEOM #####
  3  1
  7.00      0.000000000      0.000000000000000      0.000000000000000
  6.00      0.000000000      1.37268525875691      -2.16527365386260
  6.00      0.000000000      -1.37268525875691      -2.16527365386260
# LABELS #####
  3  2
  2  3
# CORIOL #####
  1
  0
  3  2  0  0  1
  1  1
# DARLING #####
  1
  3  2

# CURVIL #####
  1  2
  1  3
  1  2  3
# SYMCRD #####
  1  2  0  0
  2  1  2
  0.0 1  1
  2  1  0  0
  1  3
  0.0 1
  3  2  0  0
  2  1  2
  0.0 1 -1
# F2INT #####
  6
  1  1      8.6018373116
  2  1      3.7014874870
  3  1      0.0000000000
  2  2      6.0946522642
  3  2      0.0000000000
  3  3      5.4158489038
# F3INT #####
  10
  1  1  1      -37.2384504948
  2  1  1      -11.6436894944
  3  1  1      0.0000000000
  2  2  1      -23.3909471040
  3  2  1      0.0000000000
  3  3  1      -26.7039947528
  2  2  2      -46.5351430907
  3  2  2      0.0000000000
  3  3  2      -2.0260995372
  3  3  3      0.0000000000
# F4INT #####
  15
  1  1  1  1      133.9948601352
  2  1  1  1      29.2795021731
  3  1  1  1      0.0000000000
  2  2  1  1      54.4000520240

```

|   |   |   |   |                |
|---|---|---|---|----------------|
| 3 | 2 | 1 | 1 | 0.0000000000   |
| 3 | 3 | 1 | 1 | 103.1417808735 |
| 2 | 2 | 2 | 1 | 119.5040774409 |
| 3 | 2 | 2 | 1 | 0.0000000000   |
| 3 | 3 | 2 | 1 | -18.9583683304 |
| 3 | 3 | 3 | 1 | 0.0000000000   |
| 2 | 2 | 2 | 2 | 316.2356747980 |
| 3 | 2 | 2 | 2 | 0.0000000000   |
| 3 | 3 | 2 | 2 | -41.5885347650 |
| 3 | 3 | 3 | 2 | 0.0000000000   |
| 3 | 3 | 3 | 3 | 74.0690985068  |

Table S1: Parameters employed in the rovibrational DVR3D calculations <sup>a</sup>.

| Parameter                  | $\ell$ -CCN <sup>-</sup> ( <sup>3</sup> Σ <sup>-</sup> ) | $c$ -CNC <sup>-</sup> ( <sup>1</sup> A <sub>1</sub> ) |
|----------------------------|----------------------------------------------------------|-------------------------------------------------------|
| NPNT1 <sup>b</sup>         | 40                                                       | 40                                                    |
| NPNT2 <sup>b</sup>         | 56                                                       | 56                                                    |
| NALF <sup>c</sup>          | 80                                                       | 80                                                    |
| $r_{e,1}/a_0$ <sup>d</sup> | 2.5689                                                   | 2.7454                                                |
| $D_{e,1}/E_h$              | 0.1145                                                   | 0.2099                                                |
| $w_{e,1}/E_h$              | 0.0057                                                   | 0.0056                                                |
| $r_{e,2}/a_0$              | 3.5591                                                   | 2.1653                                                |
| $D_{e,2}/E_h$              | 0.2179                                                   | 0.3375                                                |
| $w_{e,2}/E_h$              | 0.0085                                                   | 0.0080                                                |

<sup>a</sup> Jacobi coordinates have been employed throughout. Radial and angular bases are represented by Morse oscillator-like functions and (associated) Legendre polynomials, respectively. The same parameters are utilized for the rare isotopologues.

<sup>b</sup> Number of DVR points in  $r_i$  ( $i = 1, 2$ ) from Gauss-(associated) Laguerre quadrature.

<sup>c</sup> Number of DVR points in  $\theta$  from Gauss-(associated) Legendre quadrature.

<sup>d</sup>  $r_{e,i}$ ,  $D_{e,i}$  and  $w_{e,i}$  are the equilibrium separation, fundamental frequency and dissociation energy of the relevant coordinate  $r_i$  ( $i = 1, 2$ ), respectively.

**go to summary**

Table S2: Internal coordinate force constants for  $c\text{-H}_2\text{O}(^1A_1)$ ,  $\ell\text{-HCN}(^1\Sigma_g^+)$ , and  $\ell\text{-CCO}(^3\Sigma^-)$  model systems taken from our final composite QFFs [Eqs. (2) and (7) of the manuscript]. Units are  $\text{mdyn}\text{\AA}^{-n}\text{rad}^{-m}$  appropriate for an energy unit of  $\text{mdyn}\text{\AA}(\equiv \text{aJ})$ . See Eqs. (3)-(6) in the original paper for the coordinates.

|                     | $c\text{-H}_2\text{O}(^1A_1)^{\text{a}}$ | $\ell\text{-HCN}(^1\Sigma_g^+)^{\text{b}}$ | $\ell\text{-CCO}(^3\Sigma^-)^{\text{b}}$ |
|---------------------|------------------------------------------|--------------------------------------------|------------------------------------------|
| $F_{11}$            | 8.357 866                                | 18.757 097                                 | 15.547 305                               |
| $F_{21}$            | 0.365 540                                | -0.206 468                                 | 1.119 727                                |
| $F_{22}$            | 0.703 251                                | 6.251 244                                  | 6.323 650                                |
| $F_{33/44}$         | 8.563 429                                | 0.264 816                                  | 0.291 883                                |
| $F_{111}$           | -41.7268                                 | -125.5625                                  | -113.1874                                |
| $F_{211}$           | -0.6029                                  | -0.0316                                    | -1.6699                                  |
| $F_{221}$           | -0.4480                                  | 0.1053                                     | -1.4711                                  |
| $F_{331/441}$       | -41.5576                                 | -0.7204                                    | -0.8905                                  |
| $F_{222}$           | -0.6955                                  | -35.7840                                   | -44.2481                                 |
| $F_{332/442}$       | 0.3912                                   | -0.1820                                    | -0.5236                                  |
| $F_{1111}$          | 181.89                                   | 679.57                                     | 669.36                                   |
| $F_{2111}$          | -0.47                                    | -0.05                                      | 1.79                                     |
| $F_{2211}$          | 0.30                                     | -0.95                                      | 0.57                                     |
| $F_{3311/4411}$     | 182.22                                   | 0.27                                       | 0.70                                     |
| $F_{2221}$          | 0.87                                     | -0.64                                      | 5.75                                     |
| $F_{3321/4421}$     | -1.23                                    | 0.35                                       | 1.80                                     |
| $F_{2222}$          | -0.81                                    | 185.04                                     | 212.77                                   |
| $F_{3322/4422}$     | -0.76                                    | 0.07                                       | -1.17                                    |
| $F_{3333/4444}$     | 183.44                                   | 0.89                                       | 2.29                                     |
| $F_{3344}$          |                                          | 0.65                                       | 1.15                                     |
| $r_{e,1}/\text{pm}$ | 95.755 605                               | 115.257 717                                | 115.751 957                              |
| $r_{e,2}/\text{pm}$ | 95.755 605                               | 106.478 534                                | 136.313 026                              |
| $\angle_e/^\circ$   | 104.513 727                              | 180.000 000                                | 180.000 000                              |

<sup>a</sup> Force constants in symmetry-internal displacement coordinates [Eq. (6) of the manuscript].

<sup>b</sup> Force constants in simple internal displacement coordinates [Eqs. (3)-(5) of the manuscript].

**go to summary**



Table S3: Vibrationally-averaged rotational constants (in MHz) for  $c$ -H<sub>2</sub>O(<sup>1</sup>A<sub>1</sub>),  $l$ -HCN(<sup>1</sup>Σ<sub>g</sub><sup>+</sup>), and  $l$ -CCO(<sup>3</sup>Σ<sup>-</sup>) model systems as obtained from our final QFFs (Table S2) and second-order perturbation theory (SPECTRO).

| Molecule                                             | Rotational constant |           |                         |                      |                      |
|------------------------------------------------------|---------------------|-----------|-------------------------|----------------------|----------------------|
|                                                      |                     | QFF       | Experiment <sup>a</sup> | Diff.   <sup>b</sup> | % Error <sup>c</sup> |
| $c$ -H <sub>2</sub> O( <sup>1</sup> A <sub>1</sub> ) | $A_0$               | 832 984.7 | 835 755.4               | 2770.8               | 0.332                |
|                                                      | $B_0$               | 434 963.8 | 434 974.9               | 11.1                 | 0.003                |
|                                                      | $C_0$               | 278 375.8 | 278 414.3               | 38.5                 | 0.014                |
| $l$ -HCN( <sup>1</sup> Σ <sub>g</sub> <sup>+</sup> ) | $B_0$               | 44 352.4  | 44 316.0                | 36.5                 | 0.082                |
|                                                      | $B_1$               | 44 035.5  | 44 003.5                | 32.0                 | 0.073                |
|                                                      | $B_2$               | 44 450.9  | 44 422.4                | 28.4                 | 0.064                |
|                                                      | $B_3$               | 44 051.6  | 44 013.8                | 37.8                 | 0.086                |
| $l$ -CCO( <sup>3</sup> Σ <sup>-</sup> )              | $B_0$               | 11 553.2  | 11 545.6                | 7.6                  | 0.066                |
|                                                      | $B_1$               | 11 463.7  | 11 453.5                | 10.2                 | 0.089                |
|                                                      | $B_2$               | 11 595.2  | 11 587.7                | 7.5                  | 0.064                |
|                                                      | $B_3$               | 11 489.0  | 11 479.6                | 9.5                  | 0.083                |
| Average <sup>d</sup>                                 |                     |           |                         | 271.8                | 0.087                |
| Average w/o $A_0$ H <sub>2</sub> O <sup>e</sup>      |                     |           |                         | 21.9                 | 0.062                |

<sup>a</sup> Refs. 1, 2, 3, 4.

<sup>b</sup> Absolute deviations between theory and experiment.

<sup>c</sup> Percent errors calculated using (|Diff. |/Experiment) × 100%.

<sup>d</sup> Average quantities including all data.

<sup>e</sup> Average quantities without inclusion of water  $A_0$ .

**go to summary**

Table S4: Fundamental vibrational frequencies (in  $\text{cm}^{-1}$ ) for  $c\text{-H}_2\text{O}(^1A_1)$ ,  $l\text{-HCN}(^1\Sigma_g^+)$ , and  $l\text{-CCO}(^3\Sigma^-)$  model systems as predicted from our final QFFs (Table S2) and second-order perturbation theory (SPECTRO).

| Molecule                      | Vibrational band origin |                         |                     |                      |       |
|-------------------------------|-------------------------|-------------------------|---------------------|----------------------|-------|
|                               | QFF                     | Experiment <sup>a</sup> | Diff.  <sup>b</sup> | % Error <sup>c</sup> |       |
| $c\text{-H}_2\text{O}(^1A_1)$ | $\nu_1$                 | 3653.7                  | 3656.7              | 2.9                  | 0.081 |
|                               | $\nu_2$                 | 1595.9                  | 1594.6              | 1.3                  | 0.079 |
|                               | $\nu_3$                 | 3751.9                  | 3755.8              | 3.9                  | 0.104 |
| $l\text{-HCN}(^1\Sigma_g^+)$  | $\nu_1$                 | 3309.1                  | 3311.5              | 2.4                  | 0.072 |
|                               | $\nu_2$                 | 714.8                   | 713.5               | 1.4                  | 0.193 |
|                               | $\nu_3$                 | 2100.3                  | 2096.8              | 3.4                  | 0.163 |
| $l\text{-CCO}(^3\Sigma^-)$    | $\nu_1$                 | 1978.9                  | 1970.9              | 8.1                  | 0.409 |
|                               | $\nu_2$                 | 385.6                   | 379.5               | 6.1                  | 1.608 |
|                               | $\nu_3$                 | 1066.2                  | 1066.8              | 0.6                  | 0.058 |
| Average <sup>d</sup>          |                         |                         | 3.3                 | 0.307                |       |

<sup>a</sup> Refs. 1, 2, 3, 4.

<sup>b</sup> Absolute deviations between theory and experiment.

<sup>c</sup> Percent errors calculated using  $(|\text{Diff.}|/\text{Experiment})\times 100\%$ .

<sup>d</sup> Average quantities including all data.

**go to summary**

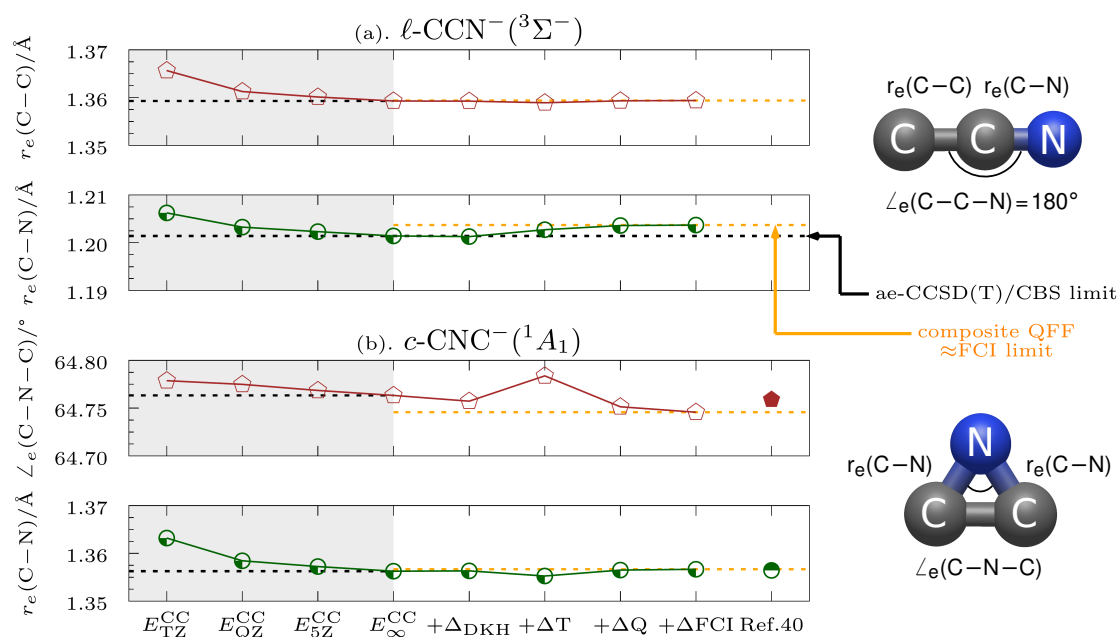

Figure S1: Convergence of the predicted equilibrium geometries for (a).  $l\text{-CCN}^- (^3\Sigma^-)$  and (b).  $c\text{-CNC}^- (^1A_1)$  as a function of each energy increment [see Eq. (7) of the paper]. For comparison, we also show the calculated values from the raw CC/ACVXZ ( $X = T, Q, 5$ ) QFFs separately as well as the most accurate results from the literature (Ref. 40 of the paper) for the  $c\text{-CNC}^-$  species [panel (b)]. Shaded gray areas mark the transition region from one-particle to  $\mathcal{N}$ -particle expansion extrapolations. Black and orange lines highlight the corresponding geometries obtained at the one-particle CBS limit ( $E_{\infty}^{\text{CC}}$ ) and from the final QFFs, respectively; ae stands for all electron (non-frozen-core) values.

go to summary

Table S5: Calculated nuclear spin-rotation interaction constants (**C** tensors) at the QFF equilibrium geometries for  $\ell$ -CCN $^-$  ( $^3\Sigma^-$ ) and  $c$ -CNC $^-$  ( $^1A_1$ ). Data obtained at the full-valence CASSCF/AV5Z level of theory using DALTON. Units are kHz.

|                           | $\ell$ -CCN $^-$ | $\ell$ - $^{13}\text{C}$ CCN $^-$ | $\ell$ -C $^{13}$ CN $^-$     | $\ell$ -CC $^{15}\text{N}$ $^-$ |
|---------------------------|------------------|-----------------------------------|-------------------------------|---------------------------------|
| $c_I(^{14}\text{N})^a$    | 1.8802           | 1.8020(5.9405)                    | 1.8802(5.6409)                | (2.5547)                        |
|                           | $c$ -CNC $^-$    | $c$ - $^{13}\text{C}$ CNC $^-$    | $c$ -C $^{15}\text{N}$ C $^-$ |                                 |
| $C_{aa}(^{14}\text{N})^a$ | 18.8880          | 18.5770(36.7986)                  | (-25.3831)                    |                                 |
| $C_{bb}(^{14}\text{N})^a$ | 14.3623          | 13.8507(36.9602)                  | (-20.1467)                    |                                 |
| $C_{cc}(^{14}\text{N})^a$ | -04762           | -0.4630(-0.4177)                  | (0.6543)                      |                                 |

<sup>a</sup> Data evaluated at the  $^{14}\text{N}$  nucleus. The corresponding values obtained at  $^{13}\text{C}$  and  $^{15}\text{N}$  are given in parenthesis.

**go to summary**

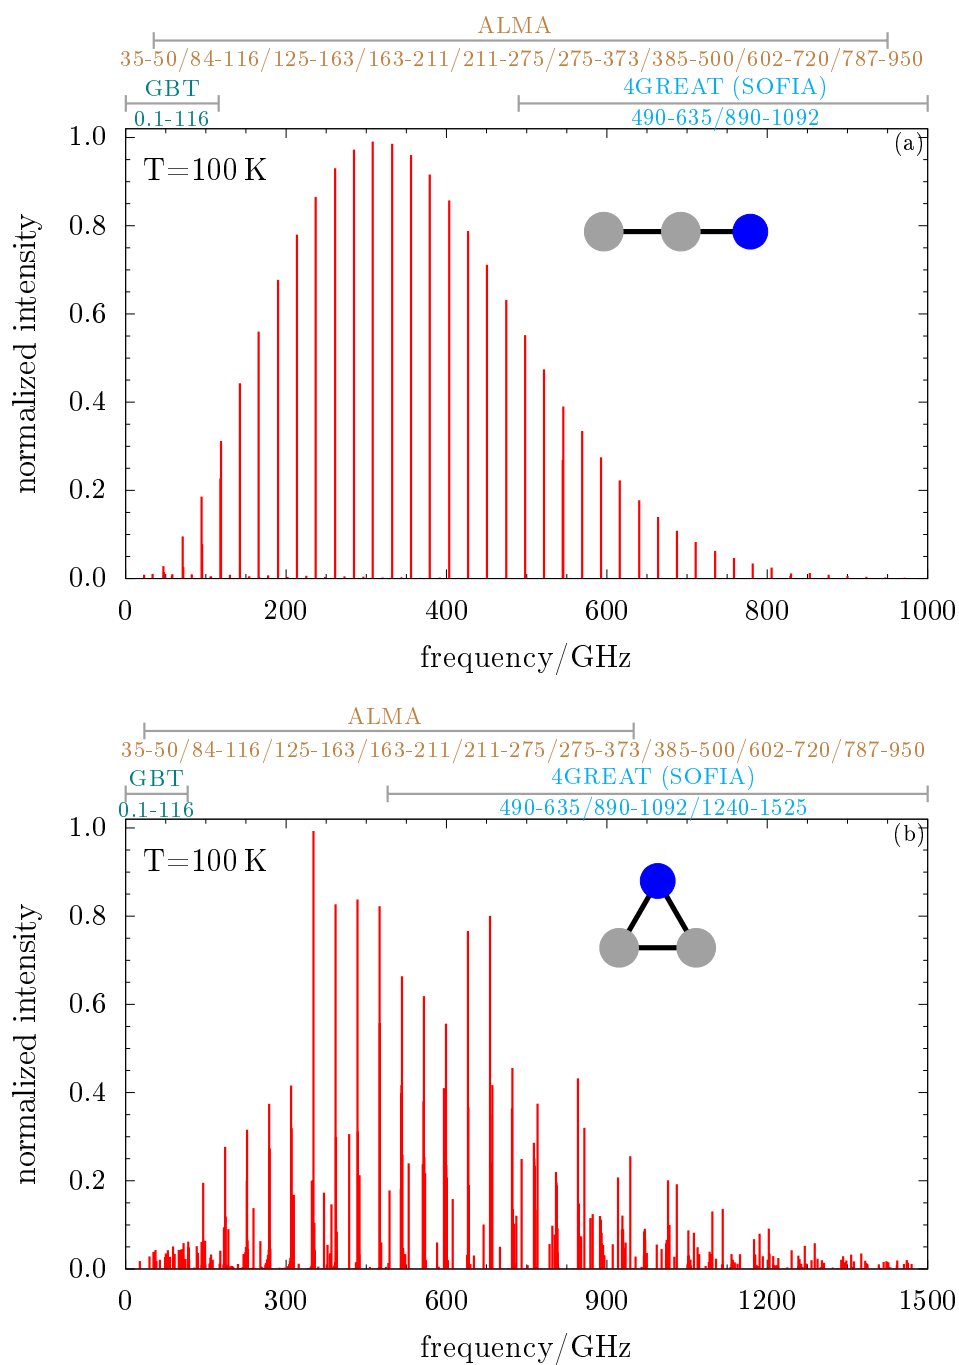

Figure S2: Simulated rotational spectra at  $T = 100$  K of (a).  $l\text{-CCN}^- (^3\Sigma^-)$  and (b).  $c\text{-CNC}^- (^1A_1)$  in their ground vibrational states. Working frequency ranges (in GHz) of the GBT, ALMA (from left to right: band 1, and bands 3 to 10) and the GREAT receiver bands (onboard the Stratospheric Observatory for Infrared Astronomy, SOFIA) are also displayed.

**go to summary**

```

<?xml version="1.0"?>
<Mixture Units="MHz" PrintLevel="plDefault" Version="PGOPHER 10.1.182
  04 Dec 2018 20:59 64 bit (fpc 3.3.1 x86_64-Linux)" PlotUnits="
  MHz">
  <Parameter Name="SmallE" Value="2E-18"/>
  <Species Name="Species" Jmax="100">
    <LinearMolecule Name="LinearMolecule" nNuclei="1" JAdjustSym="
      False">
      <LinearManifold Name="Ground" Initial="True" LimitSearch="True
        ">
        <Linear Name="v=0" S="2" Lambda="Sigma-">
          <Parameter Name="B" Value="11861.915"/>
          <Parameter Name="LambdaSS" Value="11958.871045849"/>
          <Parameter Name="gamma" Value="-19.16453035"/>
          <Parameter Name="D" Value="0.0061295907"/>
          <Parameter Name="H" Value="-2.4911113E-9"/>
          <LinearNucleus Name="Nucleus1" Spin="2">
            <Parameter Name="b" Value="25.2521"/>
            <Parameter Name="c" Value="-16.2363"/>
            <Parameter Name="eQq0" Value="-2.9088"/>
            <Parameter Name="cI" Value="0.0018802"/>
          </LinearNucleus>
        </Linear>
      </LinearManifold>
      <TransitionMoments Bra="Ground" Ket="Ground">
        <SphericalTransitionMoment Bra="v=0" Ket="v=0">
          <Parameter Name="Strength" Value="1.9873"/>
        </SphericalTransitionMoment>
      </TransitionMoments>
    </LinearMolecule>
  </Species>
  <Parameter Name="Temperature" Value="10"/>
  <Parameter Name="Fmin" Value="-6242.34857650319"/>
  <Parameter Name="Fmax" Value="300271.926137171"/>
  <FormSettings Name="ConstantsWindow" ActiveObject="LinearMolecule:
    Species - LinearMolecule"/>
</Mixture>

```

**go to summary**

```

<?xml version="1.0"?>
<Mixture Units="MHz" Version="PGOPHER 10.1.182 04 Dec 2018 20:59 64
  bit (fpc 3.3.1 x86_64-Linux)" PlotUnits="MHz">
  <Parameter Name="SmallE" Value="2E-18"/>
  <Species Name="Species" Jmax="60">
    <AsymmetricMolecule Name="AsymmetricTop" nNuclei="1" C2zAxis="b"
      PointGroup="C2v" eoWt="0" oeWt="0" JAdjustSym="False">
      <AsymmetricManifold Name="Ground" Initial="True">
        <AsymmetricTop Name="v=0">
          <Parameter Name="A" Value="43384.081"/>
          <Parameter Name="BBar" Value="30167.5775"/>
          <Parameter Name="BDelta" Value="19046.357"/>
          <Parameter Name="DK" Value="0.2062998257"/>
          <Parameter Name="DJK" Value="-0.0807246694"/>
          <Parameter Name="DJ" Value="0.1171867146"/>
          <Parameter Name="deltaK" Value="0.0867726315"/>
          <Parameter Name="deltaJ" Value="0.0494394954"/>
          <Parameter Name="HK" Value="0.0000198385516"/>
          <Parameter Name="HKJ" Value="-0.00002346133495"/>
          <Parameter Name="HJK" Value="5.884084373E-6"/>
          <Parameter Name="HJ" Value="9.114534222E-8"/>
          <Parameter Name="phiK" Value="-3.835427964E-7"/>
          <Parameter Name="phiJK" Value="2.239710312E-6"/>
          <Parameter Name="phiJ" Value="4.393211801E-8"/>
          <AsymmetricTopNucleus Name="Nucleus1" Spin="2">
            <Parameter Name="CHIzz" Value="5.0986"/>
            <Parameter Name="CHIxxmyy" Value="-2.5493"/>
            <Parameter Name="Caa" Value="0.018888002"/>
            <Parameter Name="Cbb" Value="0.014362263"/>
            <Parameter Name="Ccc" Value="-0.000476158"/>
          </AsymmetricTopNucleus>
        </AsymmetricTop>
      </AsymmetricManifold>
    <TransitionMoments Bra="Ground" Ket="Ground">
      <CartesianTransitionMoment Axis="b" Bra="v=0" Ket="v=0">
        <Parameter Name="Strength" Value="1.1011"/>
      </CartesianTransitionMoment>
    </TransitionMoments>
  </AsymmetricMolecule>
</Species>
<Parameter Name="Temperature" Value="10"/>
<Parameter Name="Fmin" Value="-3040.22031910054"/>
<Parameter Name="Fmax" Value="477889.273883812"/>
<FormSettings Name="ConstantsWindow" ActiveObject="
  AsymmetricTopNucleus: Species - AsymmetricTop - Ground - v=0 -
  Nucleus1"/>
</Mixture>

```

**go to summary**

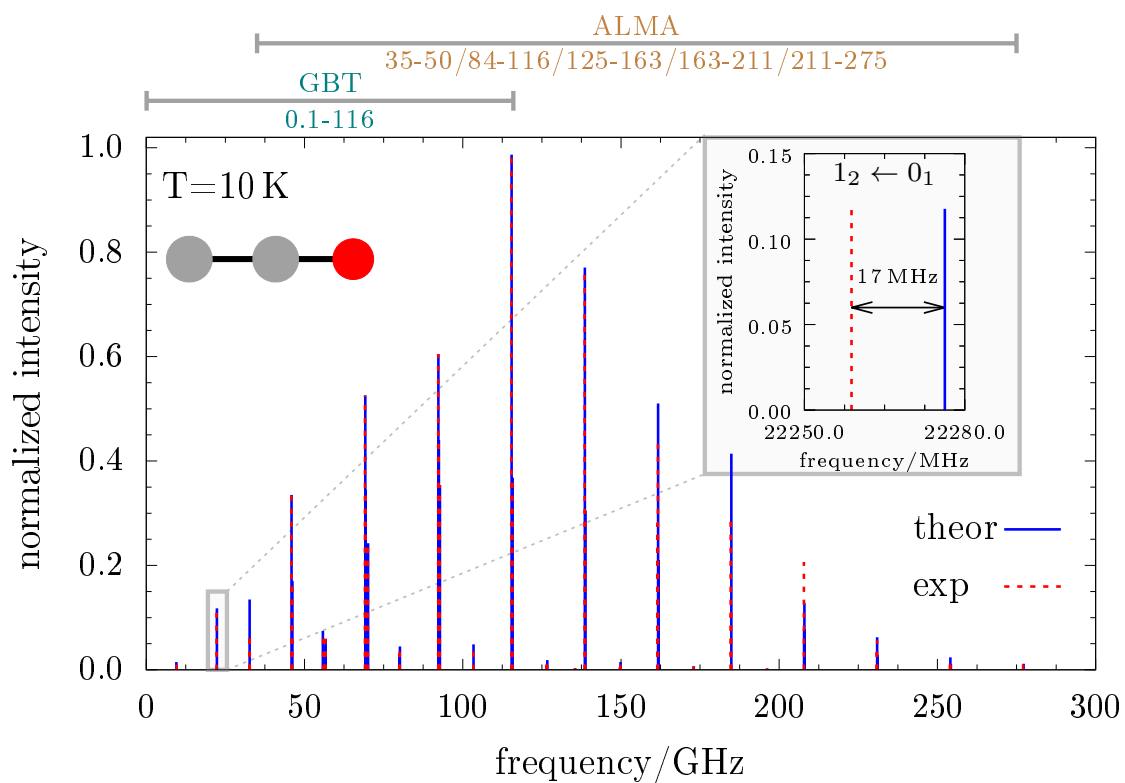

Figure S3: Simulated rotational spectra at 10 K of  $l\text{-CCO}(^3\Sigma^-)$  in its ground vibrational state. The spectroscopic constants calculated in this work have been utilized in the theoretical simulation. They are:  $B_0 = 11553.212\text{ MHz}$ ,  $D = 0.005586297\text{ MHz}$ ,  $H = -1.311221 \times 10^{-9}\text{ MHz}$ ,  $\lambda = 11594.05\text{ MHz}$ , and  $\gamma = -15.04\text{ MHz}$ . The corresponding experimental values can be found in Ref. [3]. Working frequency ranges (in GHz) of the GBT and ALMA (from left to right: band 1, and bands 3 to 6) are also displayed.

**go to summary**



## References

- [1] W. S. Benedict, N. Gailar, and E. K. Plyler, *J. Chem. Phys.* **24**, 1139 (1956).
- [2] G. C. Mellau, B. P. Winnewisser, and M. Winnewisser, *J. Mol. Spectrosc.* **249**, 23 (2008).
- [3] Z. Abusara, M. Dehghani, and N. Moazzen-Ahmadi, *Chem. Phys. Lett.* **417**, 206 (2006).
- [4] N. Ohashi, R. Kiryu, S. Okino, and M. Fujitake, *J. Mol. Spectrosc.* **157**, 50 (1993).
